# Supplementary material for: A remarkably stable acyclic phosphamethine cyanine dye
Source: Royal Society of Chemistry journal article supplement (doi:10.1039/d2dt04085a), 2023-01-01
Supplement: d2dt04085a1.pdf [file d2dt04085a1.pdf]

Supplementary Information For

## ***A Remarkably Stable Acyclic Phosphamethine Cyanine Dye***

Erica M. Dionisi,<sup>a</sup> Justin F. Binder<sup>b</sup>, James H.W. LaFortune<sup>a</sup> and Charles L.B.  
Macdonald<sup>a,b,c\*</sup>

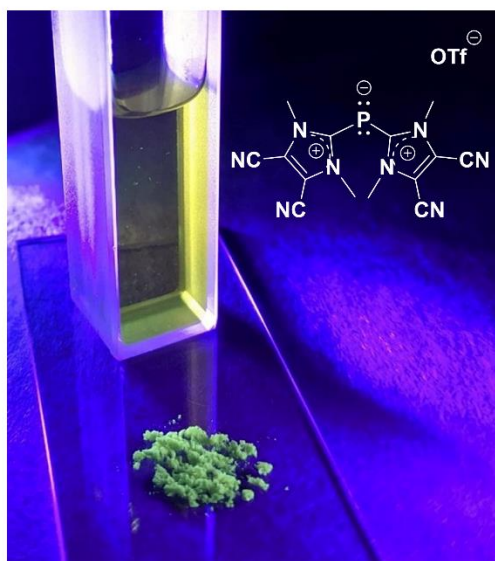

<sup>a</sup> Department of Chemistry, Carleton University, 1125 Colonel By. Dr., Ottawa, Ontario, Canada

<sup>b</sup> Department of Chemistry, University of Windsor, 401 Sunset Ave, Windsor, Ontario, Canada

<sup>c</sup> Department of Chemistry, Dalhousie University, Halifax, Nova Scotia, Canada

† Correspondence: [charles.macdonald@dal.ca](mailto:charles.macdonald@dal.ca)

## Table of Contents

|                                                                                       |          |
|---------------------------------------------------------------------------------------|----------|
| General Synthetic Considerations.....                                                 | Page S3  |
| Crystallographic Data and Structure Refinement Summary.....                           | Page S4  |
| Experimental UV-Vis of [( <sup>Me</sup> NHC <sup>CN</sup> ) <sub>2</sub> P][OTf]..... | Page S7  |
| Cyclic Voltammetry of [( <sup>Me</sup> NHC <sup>CN</sup> ) <sub>2</sub> P][OTf].....  | Page S8  |
| NMR data of 1,3-dimethyl-4,5-dicyanoimidazolium triflate.....                         | Page S9  |
| NMR data of [( <sup>Me</sup> NHC <sup>CN</sup> ) <sub>2</sub> P][OTf].....            | Page S10 |
| Computational Information.....                                                        | Page S12 |
| Optimized Structures and Cartesian Coordinates.....                                   | Page S13 |
| Computed UV-Vis of Various Protonation Sites.....                                     | Page S31 |
| DSC of [( <sup>Me</sup> NHC <sup>CN</sup> ) <sub>2</sub> P][OTf].....                 | Page S32 |
| References.....                                                                       | Page S32 |

### **General Synthetic Considerations:**

All manipulations were carried out using standard inert atmosphere techniques using a VAC Atmospheres or MBRAUN glovebox, or Schlenk line unless otherwise specified. Cyclic triphosphenium bromide [(dppe)P][Br] and salt metathesis to obtain the [OTf]<sup>-</sup> anion were performed according to literature procedures.<sup>1</sup> While 1-methyl-4,5-dicyanoimidazole was previously reported and characterized<sup>2</sup>, we report the crystal structure herein.

BUCHI Glass Oven-B-585 Kugelrohr apparatus was used. <sup>1</sup>H, <sup>13</sup>C{<sup>1</sup>H}, <sup>19</sup>F{<sup>1</sup>H}, <sup>31</sup>P{<sup>1</sup>H} and <sup>31</sup>P[<sup>1</sup>H] NMR spectra were all recorded at room temperature solutions on Bruker Advance III 500 MHz, Bruker Advance Ultrashield 300 MHz, Bruker Advance DPX 300 MHz or Jeol Resonance ECZ 400 MHz spectrometers. Chemical shifts were reported in parts per million and internally referenced by the residual solvent signals relative to tetramethylsilane (<sup>1</sup>H and <sup>13</sup>C) or externally to 85% H<sub>3</sub>PO<sub>4</sub> (<sup>31</sup>P) and <sup>19</sup>F (CFCl<sub>3</sub>). All coupling constants are reported in Hertz.

Elemental compositions were determined at the University of Windsor on a PerkinElmer 2400 Series II Elemental Analyzer. The melting point of 1,3-dimethyl-4,5-dicyanoimidazolium triflate was determined using an Electrothermal Mel-Temp melting point-apparatus in a sealed (under nitrogen) capillary tube.

Differential Scanning Calorimetry (DSC) experiments were performed with a TA Instruments Q10 instrument. The DSC was calibrated at the melting point of indium metal (156.6°C). The sample was hermetically sealed in an aluminium pan inside a glovebox prior to analysis. The sample was heated to 400°C with a ramp rate of 10°C·min<sup>-1</sup>, using nitrogen (99.998% purity) as the purge gas.

### **Overview of Purification of Reagents:**

| Reagent(s)                                                     | Supplier          | Purification Method                                                                            |
|----------------------------------------------------------------|-------------------|------------------------------------------------------------------------------------------------|
| Dichloromethane                                                | Fisher Scientific | Doubly distilled over CaH <sub>2</sub> , degassed and stored over 3 Å molecular sieves         |
| Toluene, acetonitrile, diethyl ether, hexanes, tetrahydrofuran | Fisher Scientific | Singly distilled over sodium benzophenone ketyl, degassed and stored over 3 Å molecular sieves |
| Triethylamine                                                  | Sigma Aldrich     | Singly distilled over CaH <sub>2</sub> , degassed and stored over 3 Å molecular sieves         |
| Deuterated acetonitrile                                        | TCI Chemicals     | Three freeze-pump thaw cycles, degassed and stored over 3 Å molecular sieves                   |
| Sulfur (S <sub>8</sub> )                                       | Fisher Scientific | Sublimed using heat                                                                            |

|                      |                                                           |                          |
|----------------------|-----------------------------------------------------------|--------------------------|
| Carbon disulfide     | Alfa Aesar                                                | Used as-is               |
| Methyl triflate      | Alfa Aesar                                                | Used as-is               |
| Triflic acid         | Sigma Aldrich                                             | Used as-is               |
| 4,5-dicyanoimidazole | Sigma Aldrich (97% purity)<br>TCI Chemicals (<98% purity) | Both purities used as-is |

**Figure S1.** Thermal ellipsoid plot of 1-methyl-4,5-dicyanoimidazole. Ellipsoids are drawn using the 50% probability surface

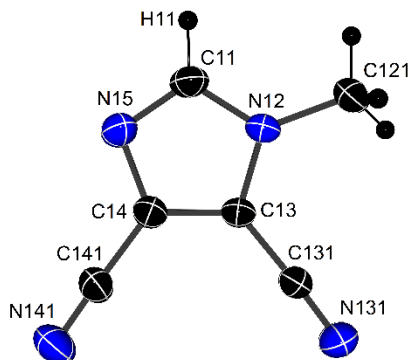

**Table S1.** Crystal data and structural refinement of 1-methyl-4,5-dicyanoimidazole

|                                             |                                                               |
|---------------------------------------------|---------------------------------------------------------------|
| Identification code                         | mo_ED5_0m                                                     |
| Empirical formula                           | C <sub>6</sub> H <sub>4</sub> N <sub>4</sub>                  |
| Formula weight                              | 132.13                                                        |
| Temperature/K                               | 170.0                                                         |
| Crystal system                              | monoclinic                                                    |
| Space group                                 | P2 <sub>1</sub> /n                                            |
| a/Å                                         | 9.1771(5)                                                     |
| b/Å                                         | 17.3436(9)                                                    |
| c/Å                                         | 12.5507(6)                                                    |
| α/°                                         | 90                                                            |
| β/°                                         | 94.606(2)                                                     |
| γ/°                                         | 90                                                            |
| Volume/Å <sup>3</sup>                       | 1991.17(18)                                                   |
| Z                                           | 12                                                            |
| ρ <sub>calc</sub> /cm <sup>3</sup>          | 1.322                                                         |
| μ/mm <sup>-1</sup>                          | 0.090                                                         |
| F(000)                                      | 816.0                                                         |
| Crystal size/mm <sup>3</sup>                | 0.54 × 0.45 × 0.402                                           |
| Radiation                                   | MoKα (λ = 0.71073)                                            |
| 2θ range for data collection/°              | 5.716 to 56.72                                                |
| Index ranges                                | -12 ≤ h ≤ 12, -23 ≤ k ≤ 23, -16 ≤ l ≤ 16                      |
| Reflections collected                       | 179834                                                        |
| Independent reflections                     | 4981 [R <sub>int</sub> = 0.0444, R <sub>sigma</sub> = 0.0101] |
| Data/restraints/parameters                  | 4981/0/366                                                    |
| Goodness-of-fit on F <sup>2</sup>           | 1.118                                                         |
| Final R indexes [I ≥ 2σ (I)]                | R <sub>1</sub> = 0.0438, wR <sub>2</sub> = 0.1082             |
| Final R indexes [all data]                  | R <sub>1</sub> = 0.0600, wR <sub>2</sub> = 0.1259             |
| Largest diff. peak/hole / e Å <sup>-3</sup> | 0.27/-0.27                                                    |

**Figure S2.** Thermal ellipsoid plot of 1,3-dimethyl-4,5-dicyanoimidazolium triflate. Ellipsoids are drawn using the 50% probability surface

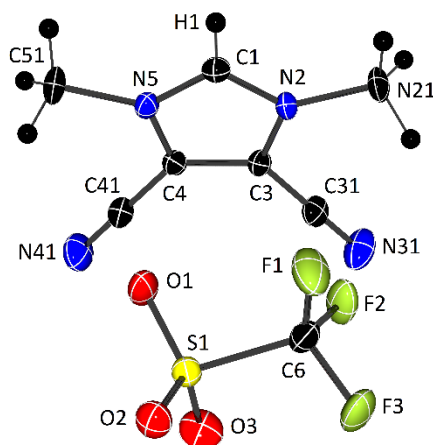

**Table S2.** Crystal data and structural refinement of 1,3-dimethyl-4,5-dicyanoimidazolium triflate. Ellipsoids are drawn using the 50% probability surface

|                                                |                                                               |
|------------------------------------------------|---------------------------------------------------------------|
| Identification code                            | ED6                                                           |
| Empirical formula                              | $C_8H_7F_3N_4O_3S$                                            |
| Formula weight                                 | 296.24                                                        |
| Temperature/K                                  | 170.0                                                         |
| Crystal system                                 | monoclinic                                                    |
| Space group                                    | $P2_1/n$                                                      |
| a/Å                                            | 8.8689(10)                                                    |
| b/Å                                            | 8.0859(10)                                                    |
| c/Å                                            | 16.865(2)                                                     |
| $\alpha/^\circ$                                | 90                                                            |
| $\beta/^\circ$                                 | 104.304(4)                                                    |
| $\gamma/^\circ$                                | 90                                                            |
| Volume/Å <sup>3</sup>                          | 1171.9(3)                                                     |
| Z                                              | 4                                                             |
| $\rho_{\text{calc}}/\text{cm}^3$               | 1.679                                                         |
| $\mu/\text{mm}^{-1}$                           | 0.327                                                         |
| F(000)                                         | 600.0                                                         |
| Crystal size/mm <sup>3</sup>                   | 0.18 × 0.053 × 0.02                                           |
| Radiation                                      | MoK $\alpha$ ( $\lambda = 0.71073$ )                          |
| 2 $\theta$ range for data collection/ $^\circ$ | 5.876 to 50.152                                               |
| Index ranges                                   | $-10 \leq h \leq 10, -9 \leq k \leq 9, -20 \leq l \leq 20$    |
| Reflections collected                          | 28762                                                         |
| Independent reflections                        | 2086 [ $R_{\text{int}} = 0.1434, R_{\text{sigma}} = 0.0487$ ] |
| Data/restraints/parameters                     | 2086/0/174                                                    |
| Goodness-of-fit on $F^2$                       | 1.060                                                         |
| Final R indexes [ $I \geq 2\sigma(I)$ ]        | $R_1 = 0.0443, wR_2 = 0.0888$                                 |
| Final R indexes [all data]                     | $R_1 = 0.0748, wR_2 = 0.0992$                                 |
| Largest diff. peak/hole / e Å <sup>-3</sup>    | 0.26/-0.42                                                    |

**Figure S3.** Thermal ellipsoid plot of  $[(\text{MeNHC}^{\text{CN}})_2\text{P}][\text{OTf}]$ . Ellipsoids are drawn using the 50% probability surface.

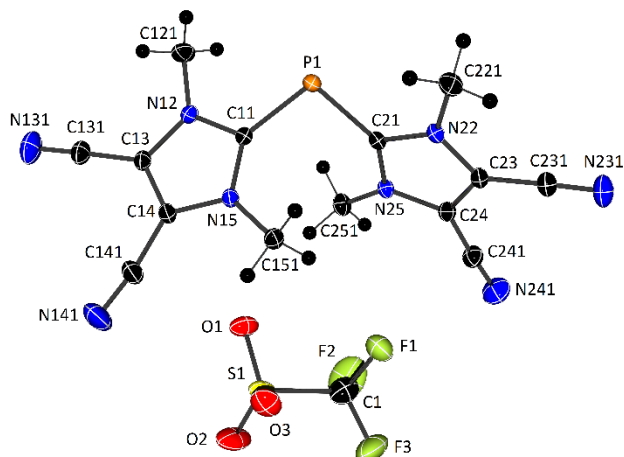

**Table S3.** Crystal data and structural refinement of  $[(\text{MeNHC}^{\text{CN}})_2\text{P}][\text{OTf}]$ . Ellipsoids are drawn using the 50% probability surface

|                                               |                                                                     |
|-----------------------------------------------|---------------------------------------------------------------------|
| Identification code                           | ED17_P21n                                                           |
| Empirical formula                             | $\text{C}_{15}\text{H}_{12}\text{F}_3\text{N}_8\text{O}_3\text{PS}$ |
| Formula weight                                | 472.36                                                              |
| Temperature/K                                 | 170.0                                                               |
| Crystal system                                | monoclinic                                                          |
| Space group                                   | $\text{P2}_1/\text{n}$                                              |
| $a/\text{\AA}$                                | 10.8578(5)                                                          |
| $b/\text{\AA}$                                | 10.3183(5)                                                          |
| $c/\text{\AA}$                                | 18.2063(9)                                                          |
| $\alpha/^\circ$                               | 90                                                                  |
| $\beta/^\circ$                                | 90.357(2)                                                           |
| $\gamma/^\circ$                               | 90                                                                  |
| Volume/ $\text{\AA}^3$                        | 2039.69(17)                                                         |
| Z                                             | 4                                                                   |
| $\rho_{\text{calc}}/\text{g cm}^{-3}$         | 1.538                                                               |
| $\mu/\text{mm}^{-1}$                          | 0.300                                                               |
| F(000)                                        | 960.0                                                               |
| Crystal size/ $\text{mm}^3$                   | $0.406 \times 0.33 \times 0.24$                                     |
| Radiation                                     | MoK $\alpha$ ( $\lambda = 0.71073$ )                                |
| $2\theta$ range for data collection/ $^\circ$ | 5.88 to 72.994                                                      |
| Index ranges                                  | $-18 \leq h \leq 18, -16 \leq k \leq 17, -30 \leq l \leq 30$        |
| Reflections collected                         | 91074                                                               |
| Independent reflections                       | 9515 [ $R_{\text{int}} = 0.0295, R_{\text{sigma}} = 0.0205$ ]       |
| Data/restraints/parameters                    | 9515/0/284                                                          |
| Goodness-of-fit on $F^2$                      | 1.025                                                               |
| Final R indexes [ $I \geq 2\sigma(I)$ ]       | $R_1 = 0.0383, wR_2 = 0.0965$                                       |
| Final R indexes [all data]                    | $R_1 = 0.0582, wR_2 = 0.1062$                                       |
| Largest diff. peak/hole / $e \text{\AA}^{-3}$ | 0.46/-0.66                                                          |

**Figure S4:** Experimental UV-Vis analysis of  $[(^{\text{Me}}\text{NHC}^{\text{CN}})_2\text{P}][\text{OTf}]$

Experimental UV-Vis was obtained from a  $2.117 \times 10^{-4}$  M solution of  $[(^{\text{Me}}\text{NHC}^{\text{CN}})_2\text{P}][\text{OTf}]$  in dry acetonitrile. Instrumentation used was a Cary 300 machine

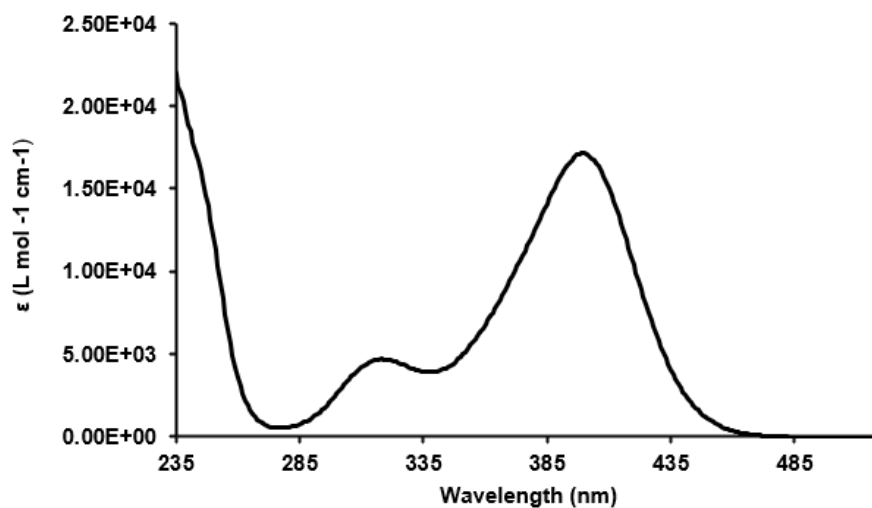

**Table S4:** UV-Vis  $\lambda_{\text{max}}$  and  $\epsilon$  ( $\text{L mol}^{-1} \text{cm}^{-1}$ ) values of  $[(^{\text{Me}}\text{NHC}^{\text{CN}})_2\text{P}][\text{OTf}]$  and previously reported phosphamethine cyanine variants  $[(^{\text{Me}}\text{NHC}^{\text{Me}})_2\text{P}][\text{Br}]$ ,  $[(^{\text{Et}}\text{NHC}^{\text{Me}})_2\text{P}][\text{Br}]$  and  $[(^{\text{iPr}}\text{NHC}^{\text{Me}})_2\text{P}][\text{Br}]$

| Dye Species                                                    | $\lambda_{\text{max}}$ | $\epsilon$ ( $\text{L mol}^{-1} \text{cm}^{-1}$ ) |
|----------------------------------------------------------------|------------------------|---------------------------------------------------|
| $[(^{\text{Me}}\text{NHC}^{\text{CN}})_2\text{P}][\text{OTf}]$ | 399                    | 17,000                                            |
| $[(^{\text{Me}}\text{NHC}^{\text{Me}})_2\text{P}][\text{Br}]$  | 379                    | 12,000                                            |
| $[(^{\text{Et}}\text{NHC}^{\text{Me}})_2\text{P}][\text{Br}]$  | 393                    | 9,800                                             |
| $[(^{\text{iPr}}\text{NHC}^{\text{Me}})_2\text{P}][\text{Br}]$ | 394                    | 6,900                                             |

**Figure S5:** Cyclic Voltammetry

Cyclic voltammetry was performed in dry MeCN solutions using a  $[\text{NBu}_4][\text{PF}_6]$  (0.1 M) electrolyte with a  $[(\text{MeNHC}^{\text{CN}})_2\text{P}][\text{OTf}]$  concentration of 0.01M. A glassy carbon electrode, a platinum wire, and an Ag/AgCl electrode were used as the working, auxiliary, and reference electrodes, respectively. The experiments were run at a scan rate of 100 mV/s.

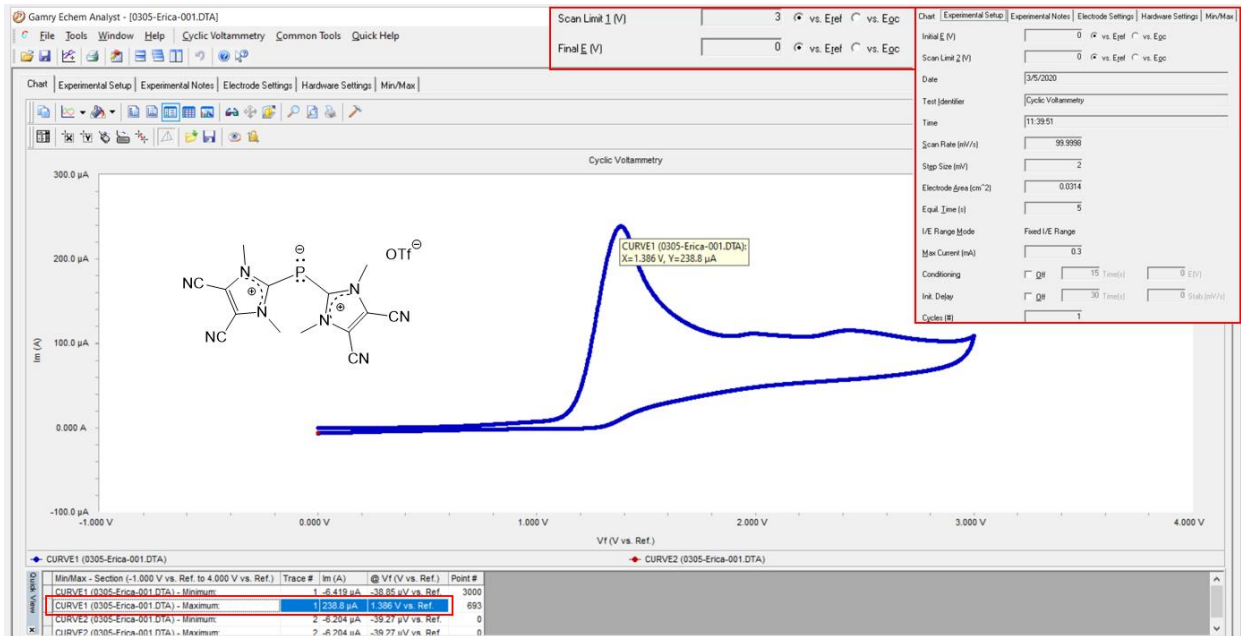



## NMR Analysis

Figure S8: 1,3-dimethyl-4,5-dicyanoimidazolium triflate  $^1\text{H}$  in  $\text{CD}_3\text{CN}$

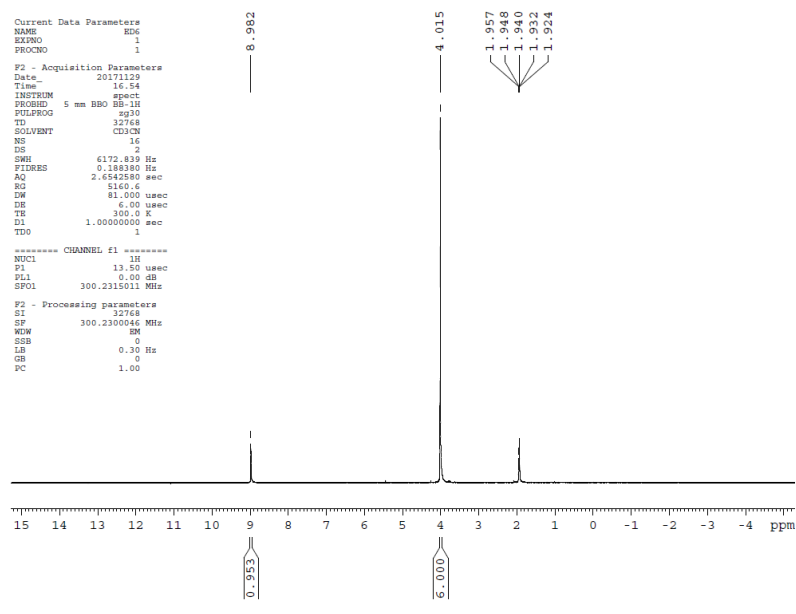

Figure S9: 1,3-dimethyl-4,5-dicyanoimidazolium triflate  $^{13}\text{C}\{^1\text{H}\}$  in  $\text{CD}_3\text{CN}$

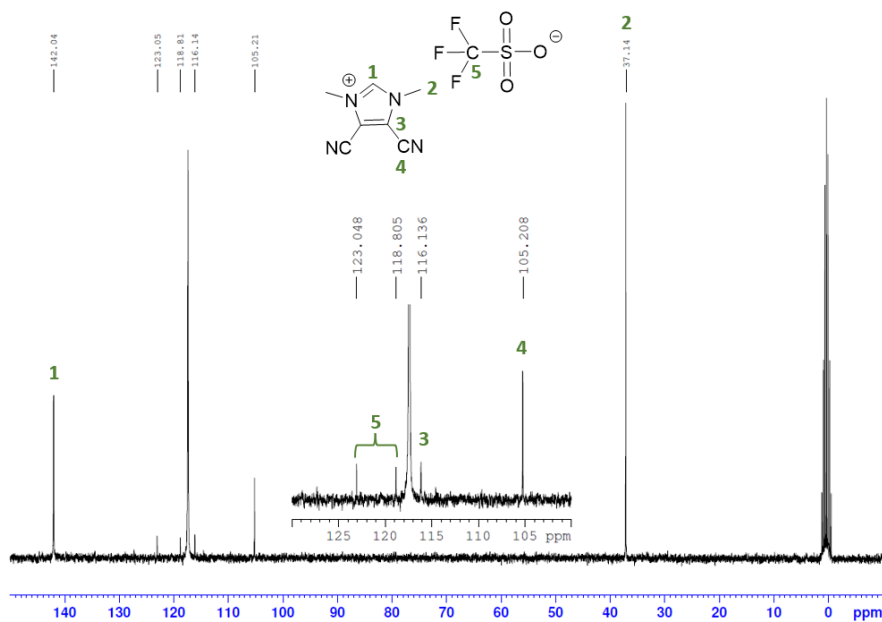

Figure S10: 1,3-dimethyl-4,5-dicyanoimidazolium triflate  $^{19}\text{F}\{^1\text{H}\}$  in  $\text{CD}_3\text{CN}$

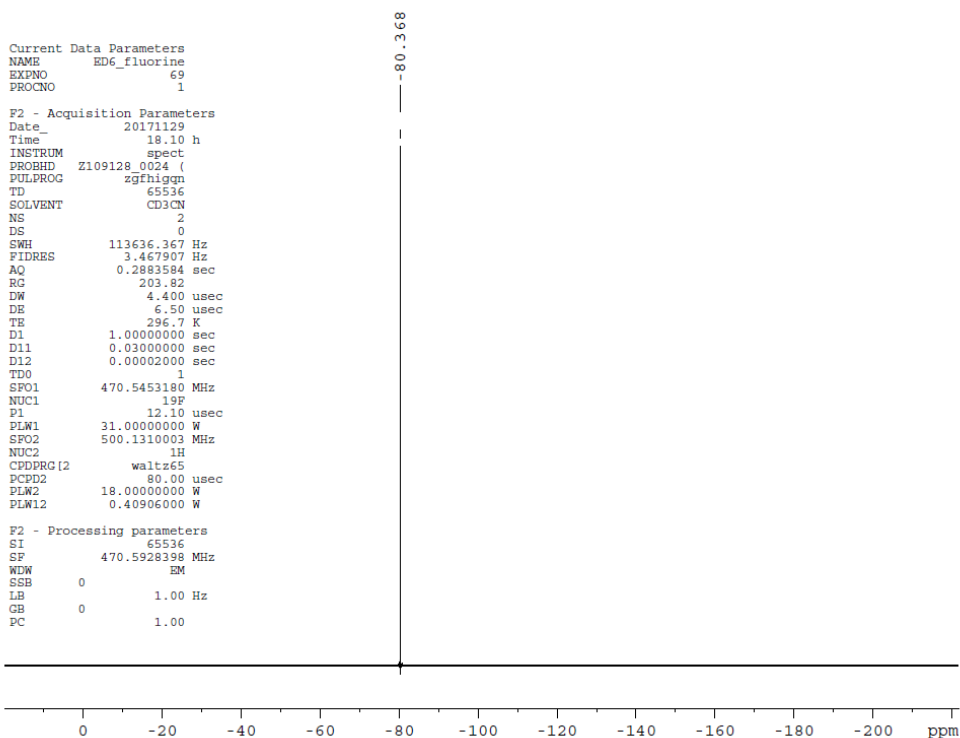

Figure S11:  $[(\text{MeNHCN})_2\text{P}][\text{OTf}]$   $^1\text{H}$  in  $\text{CD}_3\text{CN}$

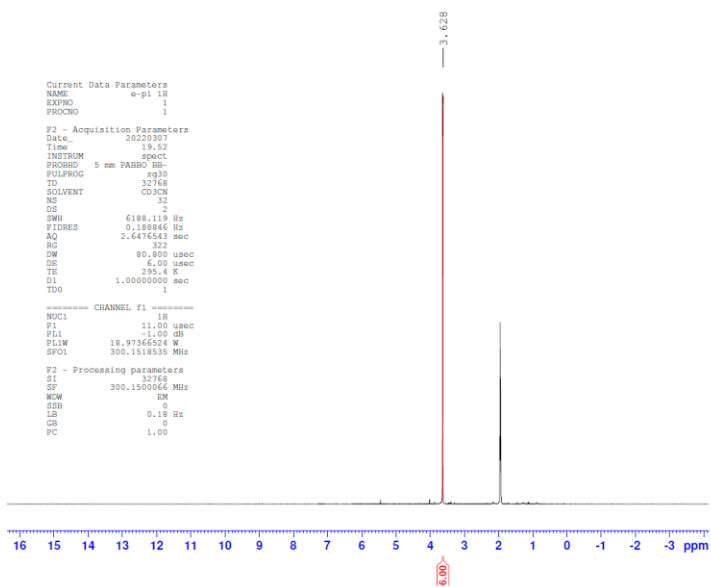

Figure S12:  $[(\text{MeNHCN})_2\text{P}][\text{OTf}]$   $^{13}\text{C}\{^1\text{H}\}$  in  $\text{CD}_3\text{CN}$

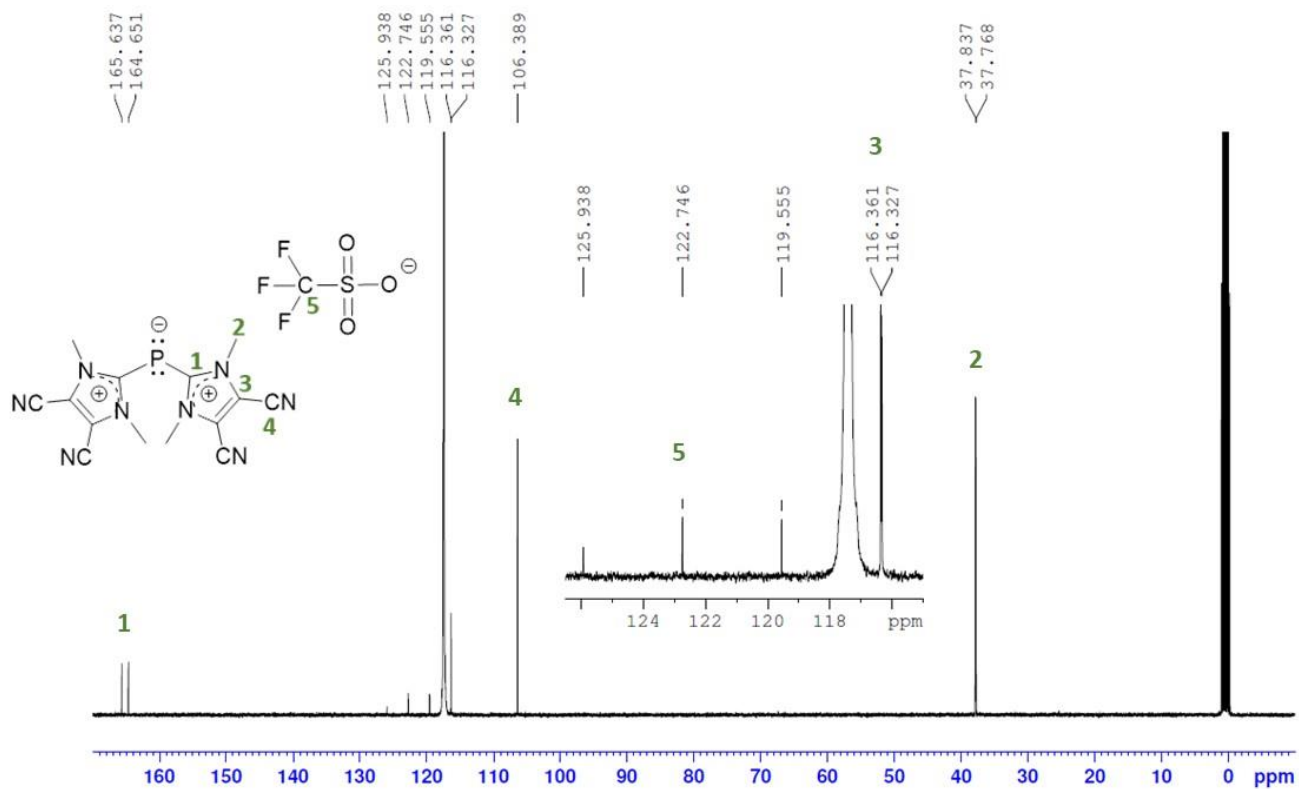

Figure S13:  $[(\text{MeNHCN})_2\text{P}][\text{OTf}]$   $^{19}\text{F}\{^1\text{H}\}$  in  $\text{CD}_3\text{CN}$

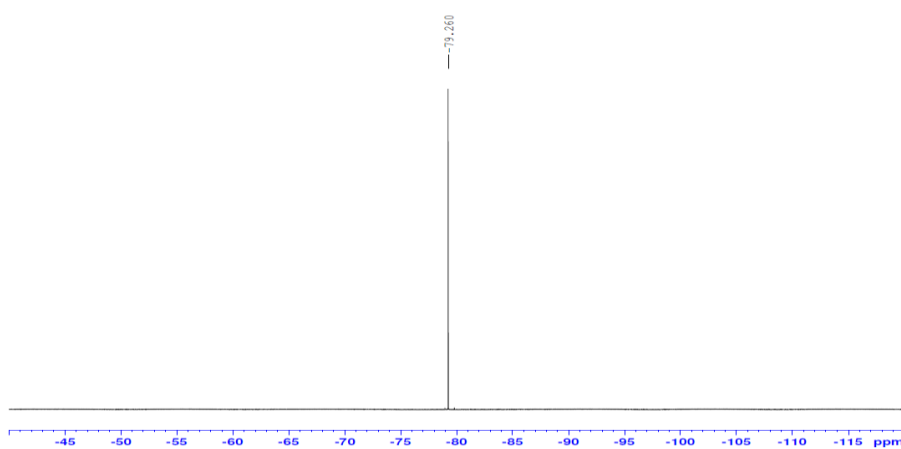

**Figure S14:**  $[(\text{MeNHC}^{\text{CN}})_2\text{P}][\text{OTf}] \text{ } ^{31}\text{P}\{^1\text{H}\}$  in  $\text{CD}_3\text{CN}$

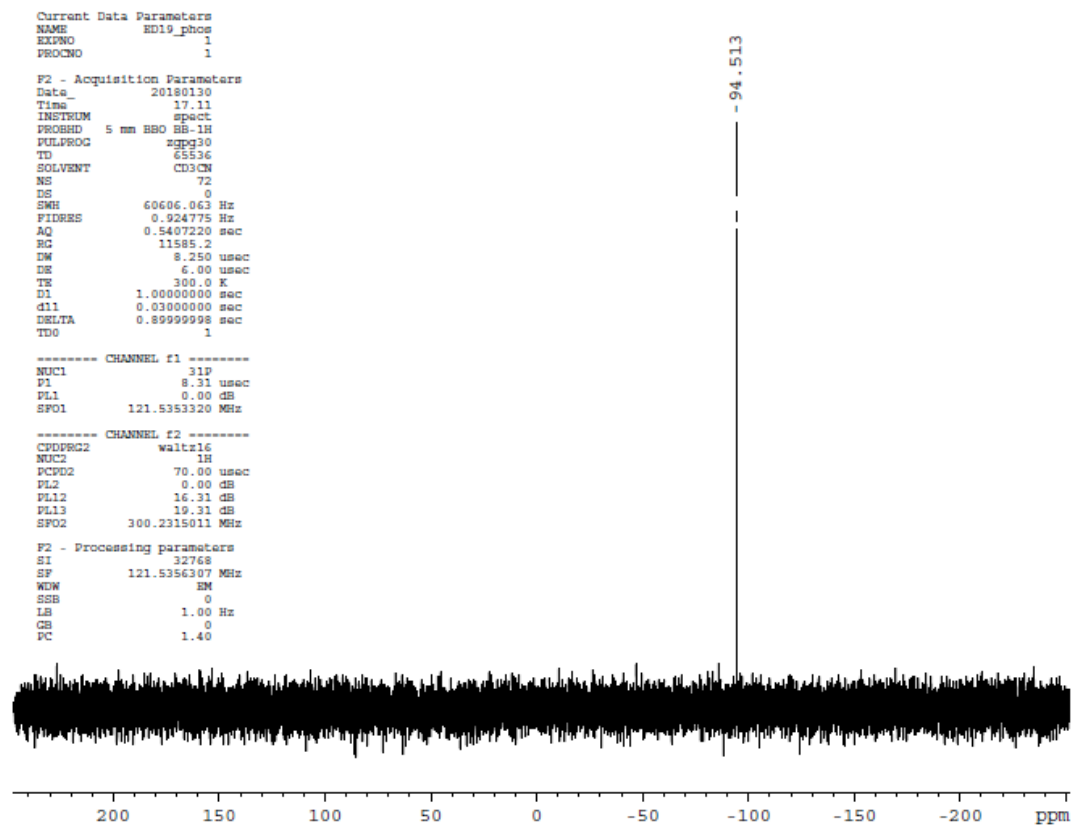

## Computational Supplementary Information

### General Remarks

Calculations were performed with the Gaussian 16 suite of programs<sup>1</sup> using Compute Canada's Shared Hierarchical Academic Research Computing Network (SharcNet). Model complexes were fully optimized with no symmetry constraints using the M062X density functional theory (DFT) method<sup>2</sup> in conjunction with the Def2-TZVP basis sets with GD3 empirical dispersion for all atoms<sup>3-5</sup> using Gaussview 6.1.1. Frequency calculations were also performed at the same level of theory in order to confirm that the optimized structures were minima on the potential energy hypersurface and to determine thermochemical information.

**Figure S15:** Optimized geometry of  $[(\text{MeNHC}^{\text{CN}})_2\text{P}]^+ \text{ } ^1[\text{OTf}]$

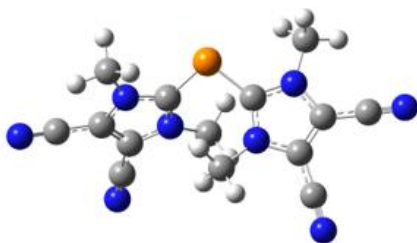

**Table S15:** Cartesian coordinates for the optimized structure of  $[(\text{MeNHCN})_2\text{P}]^+ \mathbf{1}[\text{OTf}]$

Input orientation:

| Center<br>Number | Atomic<br>Number | Atomic<br>Type | Coordinates (Angstroms) |          |           |
|------------------|------------------|----------------|-------------------------|----------|-----------|
|                  |                  |                | X                       | Y        | Z         |
| 1                | 15               | 0              | -1.785495               | 2.930451 | 10.161420 |
| 2                | 6                | 0              | -2.525405               | 4.165716 | 11.236911 |
| 3                | 7                | 0              | -2.917801               | 3.880360 | 12.501633 |
| 4                | 7                | 0              | -2.662547               | 5.507105 | 11.087448 |
| 5                | 6                | 0              | -2.478180               | 3.503670 | 8.605276  |
| 6                | 7                | 0              | -1.796308               | 3.421394 | 7.437720  |
| 7                | 7                | 0              | -3.730362               | 3.918767 | 8.288341  |
| 8                | 6                | 0              | -2.613397               | 3.783634 | 6.392258  |
| 9                | 6                | 0              | -3.822373               | 4.111767 | 6.924878  |
| 10               | 6                | 0              | -0.405966               | 2.990009 | 7.304491  |
| 11               | 1                | 0              | -0.343571               | 1.906365 | 7.389286  |
| 12               | 1                | 0              | -0.038968               | 3.303801 | 6.330917  |
| 13               | 1                | 0              | 0.178208                | 3.453664 | 8.097098  |
| 14               | 6                | 0              | -4.862368               | 4.009085 | 9.202350  |
| 15               | 1                | 0              | -5.779250               | 3.905738 | 8.627589  |
| 16               | 1                | 0              | -4.783238               | 3.196394 | 9.922690  |
| 17               | 1                | 0              | -4.872665               | 4.968960 | 9.718102  |
| 18               | 6                | 0              | -2.223054               | 6.292702 | 9.940879  |
| 19               | 1                | 0              | -1.307918               | 5.846858 | 9.554364  |
| 20               | 1                | 0              | -2.987906               | 6.313050 | 9.164964  |
| 21               | 1                | 0              | -2.027801               | 7.309142 | 10.273142 |
| 22               | 6                | 0              | -2.913401               | 2.547969 | 13.102926 |
| 23               | 1                | 0              | -3.544843               | 2.566133 | 13.987208 |
| 24               | 1                | 0              | -3.301248               | 1.838053 | 12.374885 |

|    |   |   |           |          |           |
|----|---|---|-----------|----------|-----------|
| 25 | 1 | 0 | -1.898360 | 2.269595 | 13.381476 |
| 26 | 6 | 0 | -3.157315 | 6.054262 | 12.253861 |
| 27 | 6 | 0 | -3.301068 | 5.034538 | 13.144109 |
| 28 | 6 | 0 | -3.432349 | 7.436077 | 12.399275 |
| 29 | 7 | 0 | -3.642625 | 8.560721 | 12.475499 |
| 30 | 6 | 0 | -3.764064 | 5.061506 | 14.483293 |
| 31 | 7 | 0 | -4.140369 | 5.052453 | 15.566103 |
| 32 | 6 | 0 | -5.003110 | 4.569731 | 6.290522  |
| 33 | 7 | 0 | -5.978041 | 4.943048 | 5.816185  |
| 34 | 6 | 0 | -2.185940 | 3.799519 | 5.041137  |
| 35 | 7 | 0 | -1.811203 | 3.808752 | 3.957785  |

---

**Figure S16:** Optimized geometry of  $[(\text{MeNHC}^{\text{CN}})_2\text{PMe}]^{2+}$  (methylation at phosphorus)

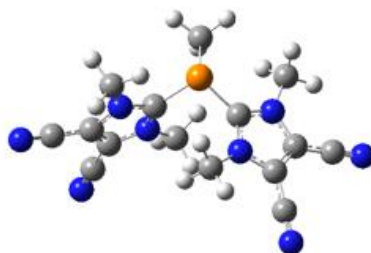

**Table S16:** Cartesian coordinates for the optimized structure of  $[(\text{MeNHC}^{\text{CN}})_2\text{PMe}]^{2+}$   
Methylation at **Site 1**

Input orientation:

| Center<br>Number | Atomic<br>Number | Atomic<br>Type | Coordinates (Angstroms) |          |           |
|------------------|------------------|----------------|-------------------------|----------|-----------|
|                  |                  |                | X                       | Y        | Z         |
| 1                | 6                | 0              | -2.420023               | 4.180611 | 11.332795 |
| 2                | 7                | 0              | -3.004135               | 3.966117 | 12.524950 |
| 3                | 7                | 0              | -2.354314               | 5.512464 | 11.149132 |
| 4                | 6                | 0              | -2.396239               | 3.423571 | 8.628752  |
| 5                | 7                | 0              | -1.724457               | 3.588610 | 7.476475  |
| 6                | 7                | 0              | -3.703499               | 3.604598 | 8.367256  |

|    |    |   |           |          |           |
|----|----|---|-----------|----------|-----------|
| 7  | 6  | 0 | -2.619914 | 3.898315 | 6.475064  |
| 8  | 6  | 0 | -3.863909 | 3.916295 | 7.037500  |
| 9  | 6  | 0 | -0.282696 | 3.408656 | 7.230191  |
| 10 | 1  | 0 | -0.013594 | 2.366478 | 7.385896  |
| 11 | 1  | 0 | -0.087000 | 3.674119 | 6.194578  |
| 12 | 1  | 0 | 0.290292  | 4.065197 | 7.877435  |
| 13 | 6  | 0 | -4.815459 | 3.460495 | 9.314540  |
| 14 | 1  | 0 | -5.729833 | 3.306583 | 8.746192  |
| 15 | 1  | 0 | -4.636292 | 2.589115 | 9.942859  |
| 16 | 1  | 0 | -4.916717 | 4.364362 | 9.914408  |
| 17 | 6  | 0 | -1.822475 | 6.236816 | 9.988529  |
| 18 | 1  | 0 | -1.050533 | 5.638833 | 9.515827  |
| 19 | 1  | 0 | -2.628501 | 6.453137 | 9.287661  |
| 20 | 1  | 0 | -1.389764 | 7.172432 | 10.336470 |
| 21 | 6  | 0 | -3.261871 | 2.679862 | 13.198652 |
| 22 | 1  | 0 | -4.267481 | 2.707648 | 13.612955 |
| 23 | 1  | 0 | -3.175713 | 1.872263 | 12.478373 |
| 24 | 1  | 0 | -2.538481 | 2.550681 | 14.002058 |
| 25 | 6  | 0 | -2.907720 | 6.147602 | 12.234123 |
| 26 | 6  | 0 | -3.310023 | 5.171327 | 13.104720 |
| 27 | 6  | 0 | -2.998674 | 7.558314 | 12.327678 |
| 28 | 7  | 0 | -3.053756 | 8.703103 | 12.355097 |
| 29 | 6  | 0 | -3.927321 | 5.272993 | 14.375960 |
| 30 | 7  | 0 | -4.431892 | 5.315079 | 15.404398 |
| 31 | 6  | 0 | -5.128075 | 4.190510 | 6.460380  |
| 32 | 7  | 0 | -6.170449 | 4.411684 | 6.037537  |
| 33 | 6  | 0 | -2.230686 | 4.141662 | 5.134857  |
| 34 | 7  | 0 | -1.884125 | 4.340640 | 4.060386  |
| 35 | 15 | 0 | -1.837203 | 2.781006 | 10.271951 |
| 36 | 6  | 0 | -0.026413 | 3.021724 | 10.376211 |
| 37 | 1  | 0 | 0.468389  | 2.288864 | 9.740244  |
| 38 | 1  | 0 | 0.341986  | 4.023178 | 10.171931 |
| 39 | 1  | 0 | 0.221185  | 2.759629 | 11.407898 |

-----

**Figure S17:** Optimized geometry of  $[(\text{MeNHC}^{\text{CN}})(\text{MeNHC}^{\text{CN}}\text{Me})\text{P}]^{2+}$  Methylation at **Site 2**

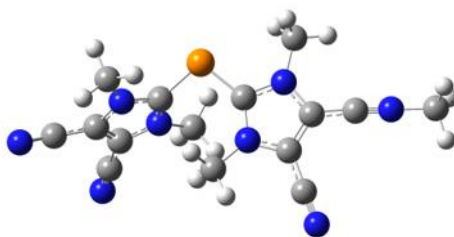

**Table S17:** Cartesian coordinates for the optimized structure of [(<sup>Me</sup>NHC<sup>CN</sup>)(<sup>Me</sup>NHC<sup>CN</sup>Me)P]<sup>2+</sup> Methylation at **Site 2**

Input orientation:

| -----  |        |        |                         |          |           |  |
|--------|--------|--------|-------------------------|----------|-----------|--|
| Center | Atomic | Atomic | Coordinates (Angstroms) |          |           |  |
| Number | Number | Type   | X                       | Y        | Z         |  |
| -----  |        |        |                         |          |           |  |
| 1      | 15     | 0      | -2.216875               | 2.724202 | 10.168035 |  |
| 2      | 6      | 0      | -2.783129               | 4.004405 | 11.248121 |  |
| 3      | 7      | 0      | -3.065612               | 3.719763 | 12.552442 |  |
| 4      | 7      | 0      | -2.903296               | 5.376275 | 11.127357 |  |
| 5      | 6      | 0      | -2.634274               | 3.458353 | 8.556261  |  |
| 6      | 7      | 0      | -1.781609               | 3.511003 | 7.513620  |  |
| 7      | 7      | 0      | -3.846431               | 3.828769 | 8.090744  |  |
| 8      | 6      | 0      | -2.452236               | 3.927185 | 6.388421  |  |
| 9      | 6      | 0      | -3.750246               | 4.141085 | 6.753201  |  |
| 10     | 6      | 0      | -0.361452               | 3.140480 | 7.530797  |  |
| 11     | 1      | 0      | -0.258186               | 2.082046 | 7.297915  |  |
| 12     | 1      | 0      | 0.157708                | 3.733510 | 6.781878  |  |
| 13     | 1      | 0      | 0.039456                | 3.345943 | 8.519742  |  |
| 14     | 6      | 0      | -5.095424               | 3.833061 | 8.849437  |  |
| 15     | 1      | 0      | -5.924712               | 3.766697 | 8.149549  |  |
| 16     | 1      | 0      | -5.096917               | 2.970325 | 9.511961  |  |
| 17     | 1      | 0      | -5.189638               | 4.753606 | 9.425446  |  |
| 18     | 6      | 0      | -2.517500               | 6.167951 | 9.958829  |  |
| 19     | 1      | 0      | -1.575358               | 5.775537 | 9.578489  |  |
| 20     | 1      | 0      | -3.286930               | 6.125711 | 9.190669  |  |
| 21     | 1      | 0      | -2.382091               | 7.200858 | 10.269956 |  |
| 22     | 6      | 0      | -3.042670               | 2.376802 | 13.125295 |  |
| 23     | 1      | 0      | -3.536800               | 2.394393 | 14.093649 |  |



|    |   |   |           |          |           |
|----|---|---|-----------|----------|-----------|
| 24 | 1 | 0 | -3.578805 | 1.704836 | 12.455171 |
| 25 | 1 | 0 | -2.014489 | 2.033698 | 13.239537 |
| 26 | 6 | 0 | -3.243716 | 5.919008 | 12.327327 |
| 27 | 6 | 0 | -3.331750 | 4.892043 | 13.229901 |
| 28 | 6 | 0 | -3.441589 | 7.304096 | 12.555436 |
| 29 | 7 | 0 | -3.604258 | 8.420250 | 12.762496 |
| 30 | 6 | 0 | -3.624989 | 5.019377 | 14.594416 |
| 31 | 6 | 0 | -4.853254 | 4.598910 | 5.990902  |
| 32 | 7 | 0 | -5.772527 | 4.974006 | 5.417679  |
| 33 | 6 | 0 | -1.821650 | 4.087136 | 5.129389  |
| 34 | 7 | 0 | -1.279925 | 4.215976 | 4.127469  |
| 35 | 7 | 0 | -3.865091 | 5.171440 | 15.699386 |
| 36 | 6 | 0 | -4.162361 | 5.385498 | 17.086060 |
| 37 | 1 | 0 | -5.082294 | 4.854826 | 17.325387 |
| 38 | 1 | 0 | -3.324386 | 5.015836 | 17.674803 |
| 39 | 1 | 0 | -4.287859 | 6.458873 | 17.226901 |

-----

**Figure S18:** Optimized geometry of  $[(\text{Me}^{\text{N}}\text{HC}^{\text{CN}})(\text{Me}^{\text{N}}\text{HC}^{\text{CN}}\text{Me})\text{P}]^{2+}$  Methylation at **Site 3**

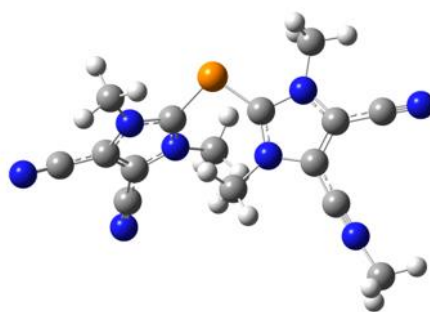

**Table S18:** Cartesian coordinates for the optimized structure of [(<sup>Me</sup>NHC<sup>CN</sup>)  
(<sup>Me</sup>NHC<sup>CN</sup>Me)P]<sup>2+</sup> Methylation at **Site 3**

Input orientation:

| Center<br>Number | Atomic<br>Number | Atomic<br>Type | Coordinates (Angstroms) |          |           |
|------------------|------------------|----------------|-------------------------|----------|-----------|
|                  |                  |                | X                       | Y        | Z         |
| 1                | 15               | 0              | -1.597087               | 3.253070 | 10.060495 |
| 2                | 6                | 0              | -2.449817               | 4.316345 | 11.264966 |
| 3                | 7                | 0              | -2.866891               | 3.894663 | 12.475321 |
| 4                | 7                | 0              | -2.580725               | 5.660187 | 11.250040 |
| 5                | 6                | 0              | -2.495483               | 3.663523 | 8.598488  |
| 6                | 7                | 0              | -1.925672               | 3.388481 | 7.367404  |
| 7                | 7                | 0              | -3.754736               | 4.118770 | 8.335916  |
| 8                | 6                | 0              | -2.798404               | 3.664837 | 6.375964  |
| 9                | 6                | 0              | -3.950082               | 4.132251 | 6.958820  |
| 10               | 6                | 0              | -0.571080               | 2.857440 | 7.189068  |
| 11               | 1                | 0              | -0.521516               | 1.850786 | 7.602793  |
| 12               | 1                | 0              | -0.344374               | 2.832175 | 6.126460  |
| 13               | 1                | 0              | 0.130490                | 3.507961 | 7.709546  |
| 14               | 6                | 0              | -4.818511               | 4.280292 | 9.320245  |
| 15               | 1                | 0              | -5.779603               | 4.205834 | 8.816497  |
| 16               | 1                | 0              | -4.741422               | 3.471476 | 10.046771 |
| 17               | 1                | 0              | -4.753887               | 5.244234 | 9.822850  |
| 18               | 6                | 0              | -2.144831               | 6.552913 | 10.178434 |
| 19               | 1                | 0              | -1.199908               | 6.183112 | 9.785738  |
| 20               | 1                | 0              | -2.891473               | 6.591539 | 9.385634  |
| 21               | 1                | 0              | -2.011228               | 7.549456 | 10.591741 |
| 22               | 6                | 0              | -2.849005               | 2.511463 | 12.966870 |
| 23               | 1                | 0              | -3.645272               | 2.395935 | 13.698050 |
| 24               | 1                | 0              | -3.008297               | 1.841298 | 12.126205 |
| 25               | 1                | 0              | -1.887903               | 2.303237 | 13.433954 |
| 26               | 6                | 0              | -3.108740               | 6.083790 | 12.449629 |
| 27               | 6                | 0              | -3.275440               | 4.972414 | 13.224399 |
| 28               | 6                | 0              | -3.403334               | 7.443048 | 12.719451 |
| 29               | 7                | 0              | -3.638162               | 8.553199 | 12.883316 |

|    |   |   |           |          |           |
|----|---|---|-----------|----------|-----------|
| 30 | 6 | 0 | -3.779866 | 4.849821 | 14.543082 |
| 31 | 7 | 0 | -4.195304 | 4.717271 | 15.603162 |
| 32 | 6 | 0 | -5.095209 | 4.546423 | 6.274394  |
| 33 | 6 | 0 | -2.527598 | 3.507406 | 4.992036  |
| 34 | 7 | 0 | -2.342748 | 3.395329 | 3.866160  |
| 35 | 6 | 0 | -7.135661 | 5.250364 | 4.868169  |
| 36 | 1 | 0 | -7.397451 | 6.276118 | 5.122005  |
| 37 | 1 | 0 | -6.832165 | 5.180457 | 3.823637  |
| 38 | 1 | 0 | -7.956239 | 4.566149 | 5.076670  |
| 39 | 7 | 0 | -6.006802 | 4.862737 | 5.662825  |

**Figure S19:** Optimized geometry of  $[(\text{MeNHC}^{\text{CN}})_2\text{PH}]^{2+}$  Protonation at **Site 1**

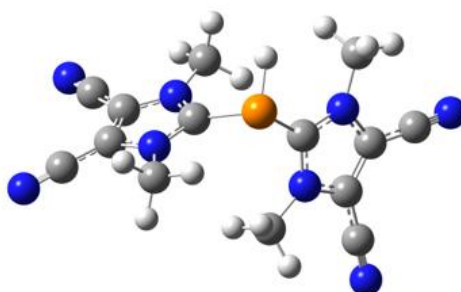

**Table S19:** Cartesian coordinates for the optimized structure of  $[(\text{MeNHC}^{\text{CN}})_2\text{PH}]^{2+}$  Protonation at **Site 1**

Input orientation:

| Center Number | Atomic Number | Atomic Type | Coordinates (Angstroms) |          |           |
|---------------|---------------|-------------|-------------------------|----------|-----------|
|               |               |             | X                       | Y        | Z         |
| 1             | 6             | 0           | -2.390996               | 4.212381 | 11.288477 |
| 2             | 7             | 0           | -3.090325               | 3.989524 | 12.414389 |
| 3             | 7             | 0           | -2.130929               | 5.531075 | 11.222409 |
| 4             | 6             | 0           | -2.562438               | 3.418381 | 8.567724  |
| 5             | 7             | 0           | -1.899045               | 3.655802 | 7.425117  |

|    |    |   |           |          |           |
|----|----|---|-----------|----------|-----------|
| 6  | 7  | 0 | -3.875527 | 3.463085 | 8.302697  |
| 7  | 6  | 0 | -2.812090 | 3.872559 | 6.417286  |
| 8  | 6  | 0 | -4.057396 | 3.759101 | 6.972263  |
| 9  | 6  | 0 | -0.439222 | 3.641587 | 7.231474  |
| 10 | 1  | 0 | -0.046228 | 2.658052 | 7.481089  |
| 11 | 1  | 0 | -0.236282 | 3.851949 | 6.184421  |
| 12 | 1  | 0 | 0.019125  | 4.414250 | 7.845911  |
| 13 | 6  | 0 | -4.962194 | 3.224920 | 9.259191  |
| 14 | 1  | 0 | -5.852696 | 2.938438 | 8.704053  |
| 15 | 1  | 0 | -4.678438 | 2.404753 | 9.917751  |
| 16 | 1  | 0 | -5.166569 | 4.134353 | 9.822764  |
| 17 | 6  | 0 | -1.336300 | 6.214995 | 10.194436 |
| 18 | 1  | 0 | -0.293218 | 5.914896 | 10.283777 |
| 19 | 1  | 0 | -1.732903 | 5.975518 | 9.210264  |
| 20 | 1  | 0 | -1.415569 | 7.286928 | 10.358631 |
| 21 | 6  | 0 | -3.586696 | 2.709487 | 12.951646 |
| 22 | 1  | 0 | -4.673692 | 2.747461 | 12.999014 |
| 23 | 1  | 0 | -3.257667 | 1.895936 | 12.313055 |
| 24 | 1  | 0 | -3.181871 | 2.577534 | 13.953500 |
| 25 | 6  | 0 | -2.676431 | 6.152478 | 12.316256 |
| 26 | 6  | 0 | -3.282797 | 5.178603 | 13.067098 |
| 27 | 6  | 0 | -2.581610 | 7.548113 | 12.541270 |
| 28 | 7  | 0 | -2.489066 | 8.681652 | 12.685158 |
| 29 | 6  | 0 | -3.997592 | 5.268964 | 14.286968 |
| 30 | 7  | 0 | -4.588140 | 5.297799 | 15.269087 |
| 31 | 6  | 0 | -5.340169 | 3.899681 | 6.388532  |
| 32 | 7  | 0 | -6.398075 | 4.007733 | 5.960283  |
| 33 | 6  | 0 | -2.435698 | 4.158524 | 5.081920  |
| 34 | 7  | 0 | -2.096194 | 4.394595 | 4.012729  |
| 35 | 15 | 0 | -1.839221 | 2.855325 | 10.168491 |
| 36 | 1  | 0 | -0.563047 | 3.391709 | 9.917997  |

---

**Figure S20:** Optimized geometry of  $[(\text{MeNHC}^{\text{CN}})(\text{MeNHC}^{\text{CNH}})\text{P}]^{2+}$  Protonation at **Site 2**

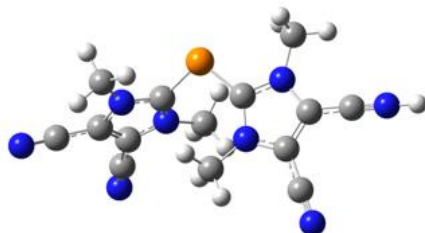

**Table S20:** Cartesian coordinates for the optimized structure of  $[(\text{MeNHC}^{\text{CN}})_2\text{P}]^{2+}$  Protonation at **Site 2**

Input orientation:

| Center Number | Atomic Number | Atomic Type | Coordinates (Angstroms) |          |           |
|---------------|---------------|-------------|-------------------------|----------|-----------|
|               |               |             | X                       | Y        | Z         |
| 1             | 15            | 0           | -1.471820               | 3.327059 | 10.079687 |
| 2             | 6             | 0           | -2.435165               | 4.352889 | 11.239001 |
| 3             | 7             | 0           | -2.952490               | 3.900051 | 12.397515 |
| 4             | 7             | 0           | -2.565019               | 5.696206 | 11.248313 |
| 5             | 6             | 0           | -2.319296               | 3.663699 | 8.572008  |
| 6             | 7             | 0           | -1.704673               | 3.416522 | 7.378675  |
| 7             | 7             | 0           | -3.618949               | 4.039808 | 8.254439  |
| 8             | 6             | 0           | -2.608078               | 3.607273 | 6.350508  |
| 9             | 6             | 0           | -3.796012               | 4.012404 | 6.913342  |
| 10            | 6             | 0           | -0.317840               | 2.978839 | 7.241615  |
| 11            | 1             | 0           | -0.219689               | 1.937223 | 7.547794  |
| 12            | 1             | 0           | -0.008089               | 3.091000 | 6.205252  |
| 13            | 1             | 0           | 0.307489                | 3.607066 | 7.876394  |
| 14            | 6             | 0           | -4.707148               | 4.240635 | 9.213380  |
| 15            | 1             | 0           | -5.652413               | 4.203284 | 8.677614  |
| 16            | 1             | 0           | -4.669807               | 3.433390 | 9.943392  |
| 17            | 1             | 0           | -4.613201               | 5.206805 | 9.704516  |
| 18            | 6             | 0           | -2.068134               | 6.617866 | 10.226950 |
| 19            | 1             | 0           | -1.103891               | 6.256755 | 9.876903  |
| 20            | 1             | 0           | -2.772706               | 6.683038 | 9.397948  |
| 21            | 1             | 0           | -1.956507               | 7.601820 | 10.675662 |
| 22            | 6             | 0           | -2.980180               | 2.506736 | 12.860702 |

|    |   |   |           |          |           |
|----|---|---|-----------|----------|-----------|
| 23 | 1 | 0 | -3.886964 | 2.354854 | 13.441412 |
| 24 | 1 | 0 | -2.972257 | 1.851606 | 11.994067 |
| 25 | 1 | 0 | -2.108347 | 2.314620 | 13.483827 |
| 26 | 6 | 0 | -3.192754 | 6.089510 | 12.408086 |
| 27 | 6 | 0 | -3.424826 | 4.957666 | 13.136600 |
| 28 | 6 | 0 | -3.502656 | 7.442370 | 12.693210 |
| 29 | 7 | 0 | -3.741867 | 8.548472 | 12.876502 |
| 30 | 6 | 0 | -4.034935 | 4.797955 | 14.405671 |
| 31 | 7 | 0 | -4.532523 | 4.632160 | 15.424909 |
| 32 | 6 | 0 | -5.011713 | 4.331600 | 6.257178  |
| 33 | 7 | 0 | -5.986774 | 4.584519 | 5.709029  |
| 34 | 6 | 0 | -2.380906 | 3.410914 | 4.991592  |
| 35 | 7 | 0 | -2.226803 | 3.259853 | 3.871342  |
| 36 | 1 | 0 | -2.107530 | 3.121345 | 2.873335  |

**Figure S21:** Optimized geometry of  $[(\text{MeNHC}^{\text{CN}})(\text{MeNHC}^{\text{CNH}})\text{P}]^{2+}$  Protonation at **Site 3**

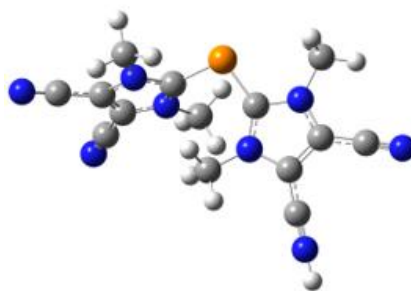

**Table S21:** Cartesian coordinates for the optimized structure of  $[(\text{MeNHC}^{\text{CN}})(\text{MeNHC}^{\text{CNH}})\text{P}]^{2+}$  Protonation at **Site 3**

Input orientation:

| Center Number | Atomic Number | Atomic Type | Coordinates (Angstroms) |          |           |
|---------------|---------------|-------------|-------------------------|----------|-----------|
|               |               |             | X                       | Y        | Z         |
| 1             | 15            | 0           | -2.256668               | 2.787711 | 10.203350 |
| 2             | 6             | 0           | -2.692303               | 4.152323 | 11.219907 |
| 3             | 7             | 0           | -2.861685               | 3.931723 | 12.584351 |
| 4             | 7             | 0           | -2.832850               | 5.497551 | 11.039027 |
| 5             | 6             | 0           | -2.670850               | 3.460690 | 8.560364  |
| 6             | 7             | 0           | -1.843099               | 3.427305 | 7.498527  |
| 7             | 7             | 0           | -3.881171               | 3.847436 | 8.106403  |

|    |   |   |           |          |           |
|----|---|---|-----------|----------|-----------|
| 8  | 6 | 0 | -2.527014 | 3.808880 | 6.369264  |
| 9  | 6 | 0 | -3.808414 | 4.085558 | 6.752407  |
| 10 | 6 | 0 | -0.437178 | 3.002042 | 7.497707  |
| 11 | 1 | 0 | -0.379969 | 1.939813 | 7.265995  |
| 12 | 1 | 0 | 0.094646  | 3.572314 | 6.739835  |
| 13 | 1 | 0 | -0.014380 | 3.194178 | 8.480019  |
| 14 | 6 | 0 | -5.110265 | 3.925398 | 8.895369  |
| 15 | 1 | 0 | -5.958434 | 3.899904 | 8.215843  |
| 16 | 1 | 0 | -5.145532 | 3.069760 | 9.566190  |
| 17 | 1 | 0 | -5.137061 | 4.852673 | 9.466877  |
| 18 | 6 | 0 | -2.462179 | 6.236033 | 9.836201  |
| 19 | 1 | 0 | -1.560467 | 5.787770 | 9.419366  |
| 20 | 1 | 0 | -3.264035 | 6.226481 | 9.099454  |
| 21 | 1 | 0 | -2.242037 | 7.266307 | 10.107321 |
| 22 | 6 | 0 | -2.772648 | 2.611510 | 13.217447 |
| 23 | 1 | 0 | -3.019237 | 2.713066 | 14.271033 |
| 24 | 1 | 0 | -3.477260 | 1.940934 | 12.727310 |
| 25 | 1 | 0 | -1.757479 | 2.231138 | 13.108223 |
| 26 | 6 | 0 | -3.099728 | 6.090823 | 12.271835 |
| 27 | 6 | 0 | -3.104733 | 5.088522 | 13.219247 |
| 28 | 6 | 0 | -3.335910 | 7.432857 | 12.525529 |
| 29 | 6 | 0 | -3.340361 | 5.211003 | 14.613296 |
| 30 | 7 | 0 | -3.536321 | 5.342861 | 15.735193 |
| 31 | 6 | 0 | -4.912896 | 4.546294 | 5.993962  |
| 32 | 7 | 0 | -5.830778 | 4.932482 | 5.425898  |
| 33 | 6 | 0 | -1.920916 | 3.884785 | 5.090530  |
| 34 | 7 | 0 | -1.397853 | 3.947405 | 4.072481  |
| 35 | 1 | 0 | -3.696894 | 9.500810 | 13.018721 |
| 36 | 7 | 0 | -3.525192 | 8.531796 | 12.775445 |

---

**Figure S22:** Optimized geometry of S<sub>8</sub>

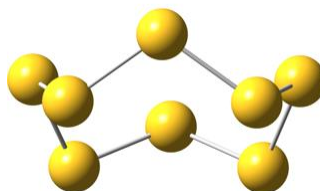

**Table S22:** Cartesian coordinates for the optimized structure of S<sub>8</sub>

Input orientation:

---

| Center Number | Atomic Number | Atomic Type | Coordinates (Angstroms) |          |           |
|---------------|---------------|-------------|-------------------------|----------|-----------|
|               |               |             | X                       | Y        | Z         |
| 1             | 16            | 0           | 1.630956                | 3.135227 | 2.139604  |
| 2             | 16            | 0           | 3.657777                | 2.846514 | 2.068519  |
| 3             | 16            | 0           | 3.999539                | 1.190775 | 0.911465  |
| 4             | 16            | 0           | 1.173508                | 4.597535 | 0.779899  |
| 5             | 16            | 0           | 0.486373                | 3.667558 | -0.910830 |
| 6             | 16            | 0           | 2.038759                | 3.598528 | -2.245758 |
| 7             | 16            | 0           | 2.854954                | 1.722771 | -2.138999 |
| 8             | 16            | 0           | 4.523098                | 1.847690 | -0.956857 |

---

**Figure S23:** Optimized geometry of [(Me<sup>+</sup>NHC<sup>CN</sup>)<sub>2</sub>PS<sub>2</sub>]<sup>+</sup>

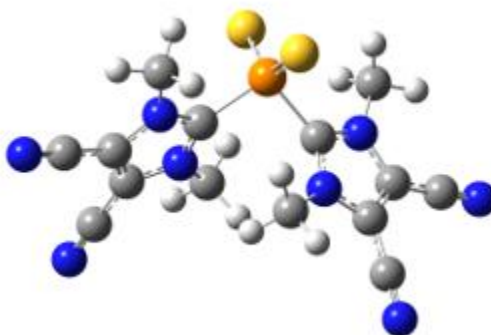



**Table S23:** Cartesian coordinates for the optimized structure of [(MeNHC<sup>CN</sup>)<sub>2</sub>PS<sub>2</sub>]<sup>+</sup>

Input orientation:

---

| Center | Atomic | Atomic | Coordinates (Angstroms) |          |           |
|--------|--------|--------|-------------------------|----------|-----------|
| Number | Number | Type   | X                       | Y        | Z         |
| 1      | 6      | 0      | -2.536023               | 4.116292 | 11.311531 |
| 2      | 7      | 0      | -3.025931               | 3.862036 | 12.534479 |
| 3      | 7      | 0      | -2.569490               | 5.448787 | 11.130046 |
| 4      | 6      | 0      | -2.413462               | 3.478985 | 8.549588  |
| 5      | 7      | 0      | -1.742569               | 3.510246 | 7.388007  |
| 6      | 7      | 0      | -3.692223               | 3.804658 | 8.288310  |
| 7      | 6      | 0      | -2.603611               | 3.875263 | 6.378411  |
| 8      | 6      | 0      | -3.829153               | 4.065205 | 6.944567  |
| 9      | 6      | 0      | -0.335006               | 3.140461 | 7.152961  |
| 10     | 1      | 0      | -0.131149               | 2.192429 | 7.641837  |
| 11     | 1      | 0      | -0.198880               | 3.047067 | 6.079176  |
| 12     | 1      | 0      | 0.318280                | 3.909189 | 7.555400  |
| 13     | 6      | 0      | -4.813234               | 3.804454 | 9.232076  |
| 14     | 1      | 0      | -5.731250               | 3.668631 | 8.666005  |
| 15     | 1      | 0      | -4.682974               | 2.969456 | 9.917442  |
| 16     | 1      | 0      | -4.860327               | 4.754509 | 9.763092  |
| 17     | 6      | 0      | -2.041422               | 6.196825 | 9.985928  |
| 18     | 1      | 0      | -1.125399               | 5.712309 | 9.653885  |
| 19     | 1      | 0      | -2.782490               | 6.241143 | 9.188712  |
| 20     | 1      | 0      | -1.816773               | 7.207273 | 10.317805 |
| 21     | 6      | 0      | -3.104653               | 2.557989 | 13.217469 |
| 22     | 1      | 0      | -3.316344               | 2.752629 | 14.265125 |
| 23     | 1      | 0      | -3.893696               | 1.958147 | 12.773387 |
| 24     | 1      | 0      | -2.152165               | 2.046331 | 13.115278 |
| 25     | 6      | 0      | -3.107017               | 6.045872 | 12.246745 |
| 26     | 6      | 0      | -3.389372               | 5.047634 | 13.131264 |
| 27     | 6      | 0      | -3.292047               | 7.446252 | 12.360265 |
| 28     | 7      | 0      | -3.431334               | 8.582903 | 12.412335 |
| 29     | 6      | 0      | -3.946810               | 5.131360 | 14.432017 |

|    |    |   |           |          |           |
|----|----|---|-----------|----------|-----------|
| 30 | 7  | 0 | -4.400748 | 5.180994 | 15.483249 |
| 31 | 6  | 0 | -5.057998 | 4.452045 | 6.354211  |
| 32 | 7  | 0 | -6.068307 | 4.768272 | 5.914489  |
| 33 | 6  | 0 | -2.210928 | 4.005408 | 5.022455  |
| 34 | 7  | 0 | -1.875771 | 4.110717 | 3.931495  |
| 35 | 15 | 0 | -1.720898 | 2.840924 | 10.184891 |
| 36 | 16 | 0 | 0.146401  | 3.274072 | 10.402893 |
| 37 | 16 | 0 | -2.567283 | 1.111894 | 10.311711 |

**Figure S24:** Optimized geometry of  $[(\text{MeNHCMe})_2\text{P}]^+$

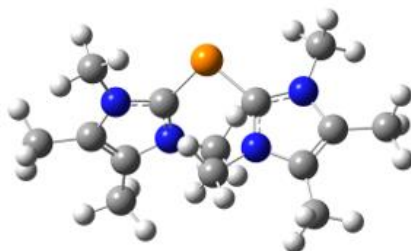

**Table S24:** Cartesian coordinates for the optimized structure of  $[(\text{MeNHCMe})_2\text{P}]^+$

Input orientation:

| Center Number | Atomic Number | Atomic Type | Coordinates (Angstroms) |          |           |
|---------------|---------------|-------------|-------------------------|----------|-----------|
|               |               |             | X                       | Y        | Z         |
| 1             | 15            | 0           | -1.746139               | 2.865876 | 10.182568 |
| 2             | 6             | 0           | -2.466545               | 4.134540 | 11.242983 |
| 3             | 7             | 0           | -2.915827               | 3.901486 | 12.494562 |
| 4             | 7             | 0           | -2.569535               | 5.470858 | 11.060882 |
| 5             | 6             | 0           | -3.298566               | 5.087190 | 13.104192 |
| 6             | 6             | 0           | -3.097352               | 6.074322 | 12.196788 |
| 7             | 6             | 0           | -2.465077               | 3.434209 | 8.629198  |
| 8             | 7             | 0           | -1.814331               | 3.409290 | 7.446569  |
| 9             | 7             | 0           | -3.724111               | 3.838511 | 8.344814  |
| 10            | 6             | 0           | -2.659882               | 3.793594 | 6.416287  |
| 11            | 6             | 0           | -3.857935               | 4.080902 | 6.982330  |
| 12            | 6             | 0           | -3.815151               | 5.133746 | 14.496904 |

|    |   |   |           |          |           |
|----|---|---|-----------|----------|-----------|
| 13 | 1 | 0 | -3.105881 | 4.684426 | 15.193653 |
| 14 | 1 | 0 | -4.764824 | 4.604498 | 14.592522 |
| 15 | 1 | 0 | -3.974441 | 6.165138 | 14.801085 |
| 16 | 6 | 0 | -3.337370 | 7.538616 | 12.284191 |
| 17 | 1 | 0 | -3.856466 | 7.774358 | 13.209811 |
| 18 | 1 | 0 | -3.954591 | 7.890320 | 11.455785 |
| 19 | 1 | 0 | -2.402599 | 8.102150 | 12.272973 |
| 20 | 6 | 0 | -2.215745 | 3.839640 | 4.998802  |
| 21 | 1 | 0 | -1.819839 | 2.874267 | 4.679926  |
| 22 | 1 | 0 | -1.440043 | 4.591523 | 4.843689  |
| 23 | 1 | 0 | -3.054964 | 4.086168 | 4.353330  |
| 24 | 6 | 0 | -5.131197 | 4.551879 | 6.377018  |
| 25 | 1 | 0 | -5.495763 | 5.454189 | 6.870804  |
| 26 | 1 | 0 | -5.912865 | 3.792505 | 6.439212  |
| 27 | 1 | 0 | -4.977761 | 4.785776 | 5.326515  |
| 28 | 6 | 0 | -0.428689 | 3.006299 | 7.271927  |
| 29 | 1 | 0 | -0.359993 | 1.933364 | 7.094457  |
| 30 | 1 | 0 | -0.006044 | 3.540426 | 6.425222  |
| 31 | 1 | 0 | 0.122116  | 3.253274 | 8.177636  |
| 32 | 6 | 0 | -4.812741 | 3.908972 | 9.300882  |
| 33 | 1 | 0 | -5.753200 | 3.767395 | 8.776017  |
| 34 | 1 | 0 | -4.682276 | 3.113930 | 10.033566 |
| 35 | 1 | 0 | -4.831020 | 4.872334 | 9.813793  |
| 36 | 6 | 0 | -2.099954 | 6.191157 | 9.892616  |
| 37 | 1 | 0 | -1.212286 | 5.689533 | 9.510065  |
| 38 | 1 | 0 | -2.861221 | 6.222552 | 9.110959  |
| 39 | 1 | 0 | -1.845698 | 7.206622 | 10.182687 |
| 40 | 6 | 0 | -2.964072 | 2.593892 | 13.127617 |
| 41 | 1 | 0 | -2.032339 | 2.386763 | 13.653320 |
| 42 | 1 | 0 | -3.790244 | 2.569628 | 13.833118 |
| 43 | 1 | 0 | -3.113198 | 1.839911 | 12.356953 |

---

**Figure S25:** Optimized geometry of CH<sub>3</sub><sup>+</sup>

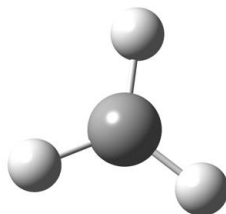

**Table S25:** Cartesian coordinates for the optimized structure of CH<sub>3</sub><sup>+</sup>

Input orientation:

| Center Number | Atomic Number | Atomic Type | Coordinates (Angstroms) |          |          |
|---------------|---------------|-------------|-------------------------|----------|----------|
|               |               |             | X                       | Y        | Z        |
| 1             | 1             | 0           | 1.371148                | 2.038663 | 0.300789 |
| 2             | 1             | 0           | -0.264543               | 2.983022 | 0.300789 |
| 3             | 1             | 0           | -0.264543               | 1.094305 | 0.300789 |
| 4             | 6             | 0           | 0.280712                | 2.038663 | 0.300789 |

**Figure S26:** Optimized geometry of MeCN

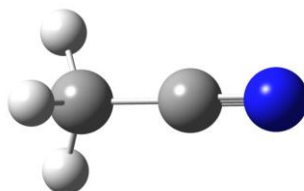

**Table S26:** Cartesian coordinates for the optimized structure of MeCN

Input orientation:

| Center Number | Atomic Number | Atomic Type | Coordinates (Angstroms) |           |          |
|---------------|---------------|-------------|-------------------------|-----------|----------|
|               |               |             | X                       | Y         | Z        |
| 1             | 6             | 0           | -0.154244               | -1.208372 | 1.002725 |

|   |   |   |           |           |          |
|---|---|---|-----------|-----------|----------|
| 2 | 7 | 0 | 0.991036  | -1.208236 | 1.002815 |
| 3 | 6 | 0 | -1.611612 | -1.208343 | 1.002728 |
| 4 | 1 | 0 | -1.980396 | -0.727679 | 1.906922 |
| 5 | 1 | 0 | -1.980494 | -0.665622 | 0.134406 |
| 6 | 1 | 0 | -1.980568 | -2.231674 | 0.966935 |

---

**Figure S27:** Optimized geometry of MeCNH<sup>+</sup>

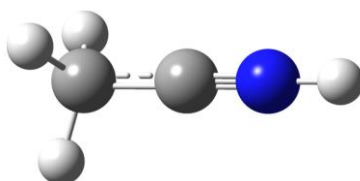

**Table S27:** Cartesian coordinates for the optimized structure of MeCNH<sup>+</sup>

Input orientation:

---

| Center | Atomic | Atomic | Coordinates (Angstroms) |           |          |
|--------|--------|--------|-------------------------|-----------|----------|
| Number | Number | Type   | X                       | Y         | Z        |
| 1      | 6      | 0      | -0.157425               | -1.208392 | 1.002755 |
| 2      | 6      | 0      | -1.597226               | -1.208358 | 1.002755 |
| 3      | 1      | 0      | -1.945073               | -0.722387 | 1.916659 |
| 4      | 1      | 0      | -1.945081               | -0.659841 | 0.124976 |
| 5      | 1      | 0      | -1.945245               | -2.242737 | 0.966615 |
| 6      | 1      | 0      | 1.988618                | -1.208237 | 1.002722 |
| 7      | 7      | 0      | 0.977072                | -1.208296 | 1.002805 |

---

**Figure S28:** Optimized geometry of MeCNMe<sup>+</sup>

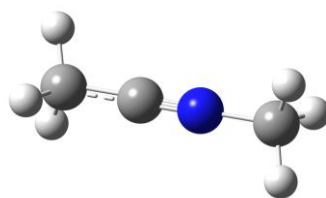

**Table S28:** Cartesian coordinates for the optimized structure of MeCNMe<sup>+</sup>

Input orientation:

| Center Number | Atomic Number | Atomic Type | Coordinates (Angstroms) |           |          |
|---------------|---------------|-------------|-------------------------|-----------|----------|
|               |               |             | X                       | Y         | Z        |
| 1             | 6             | 0           | -0.091555               | -1.208334 | 1.002828 |
| 2             | 6             | 0           | -1.537247               | -1.208642 | 1.003147 |
| 3             | 1             | 0           | -1.889228               | -0.746926 | 1.926504 |
| 4             | 1             | 0           | -1.889695               | -0.639986 | 0.141725 |
| 5             | 1             | 0           | -1.889199               | -2.239167 | 0.941484 |
| 6             | 7             | 0           | 1.044480                | -1.208093 | 1.002603 |
| 7             | 6             | 0           | 2.478480                | -1.208015 | 1.002347 |
| 8             | 1             | 0           | 2.815195                | -1.732513 | 1.893767 |
| 9             | 1             | 0           | 2.814900                | -1.717778 | 0.102317 |
| 10            | 1             | 0           | 2.815068                | -0.173758 | 1.010832 |

**Figure S29:** TD-DFT computed UV-Vis spectra for  $1^+$  protonated at three different sites

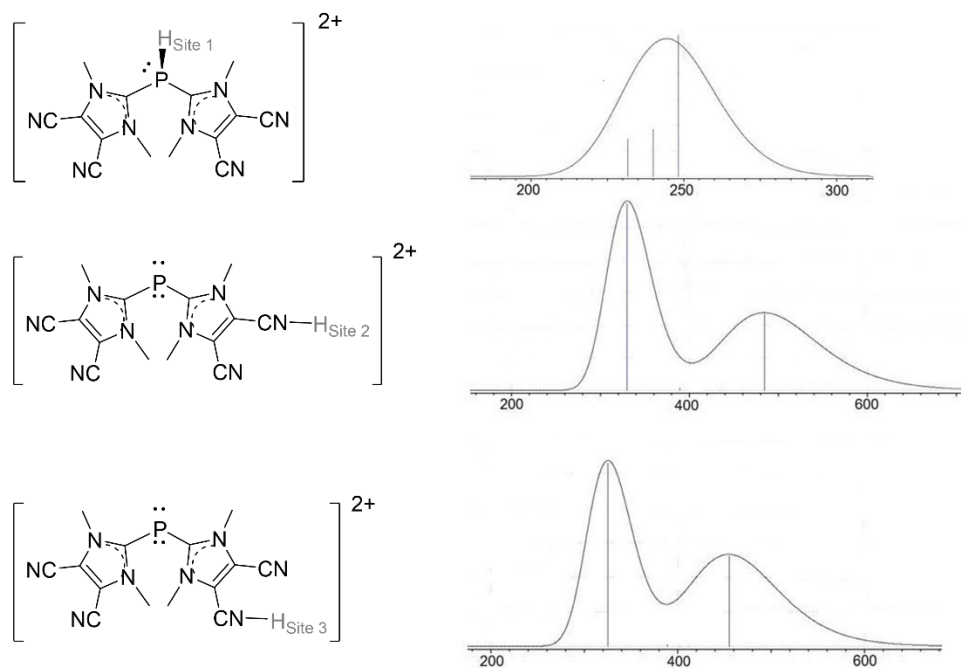

**Table S30:** TD-DFT ( $\lambda_{\max}$  highlighted) assignment for  $[(\text{MeNHC}^{\text{CN}})_2\text{P}]^+$

Excited state symmetry could not be determined.

Excited State 4: Singlet-?Sym 3.5261 eV 351.62 nm  $f=0.3177$   $\langle S^{*2} \rangle = 0.000$

83 -> 86 0.69187

Excited state symmetry could not be determined.

Excited State 5: Singlet-?Sym 3.8674 eV 320.59 nm  $f=0.0517$   $\langle S^{*2} \rangle = 0.000$

83 -> 85 -0.47019

83 -> 87 0.48921

83 -> 94 -0.10373

Excited state symmetry could not be determined.

Excited State 6: Singlet-?Sym 4.0221 eV 308.26 nm  $f=0.0578$   $\langle S^{*2} \rangle = 0.000$

83 -> 84 0.69912

**Table S31:** TD-DFT ( $\lambda_{\max}$  highlighted) assignment for  $[(^{\text{Me}}\text{NHC}^{\text{Me}})_2\text{P}]^+$

Excited state symmetry could not be determined.

Excited State 3: Singlet-?Sym 3.6122 eV 343.24 nm  $f=0.2707$   $\langle S^{*2} \rangle = 0.000$   
75 -> 76 0.69610

Excited state symmetry could not be determined.

Excited State 4: Singlet-?Sym 3.9338 eV 315.17 nm  $f=0.0236$   $\langle S^{*2} \rangle = 0.000$   
73 -> 77 0.11198  
75 -> 77 0.66305  
75 -> 85 0.13215

Excited state symmetry could not be determined.

Excited State 6: Singlet-?Sym 5.0980 eV 243.20 nm  $f=0.0176$   $\langle S^{*2} \rangle = 0.000$   
75 -> 78 0.68756

**Figure S32:** DSC trace of  $[(^{\text{Me}}\text{NHC}^{\text{CN}})_2\text{P}][\text{OTf}]$  with highlighted region displaying a decomposition event at 175°C. This corroborates the decomposition (black material) observed for samples examined using a melting point apparatus.

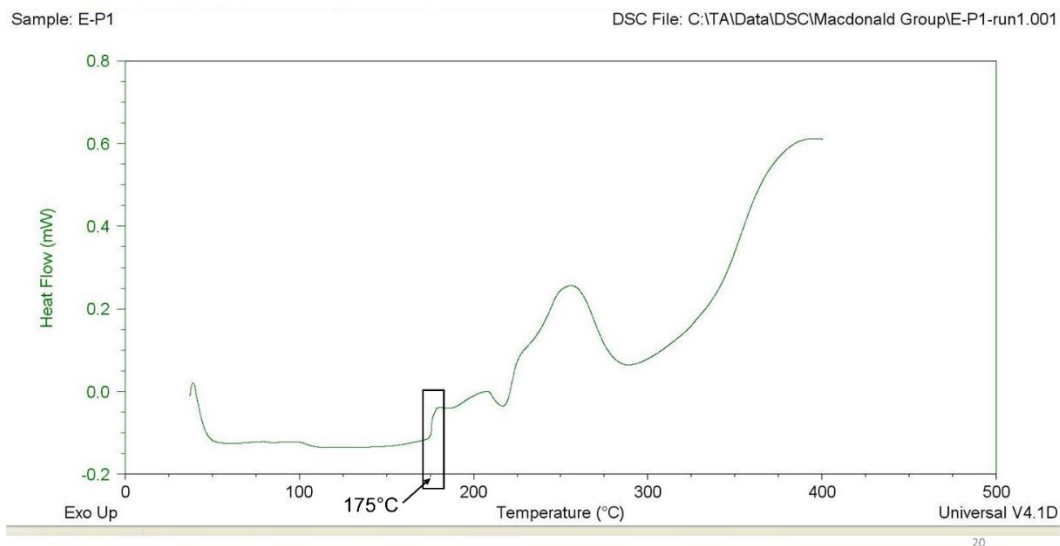



## **References**

1. M. J. Frisch, G. W. Trucks, H. B. Schlegel, G. E. Scuseria, M. A. Robb, J. R. Cheeseman, G. Scalmani, V. Barone, G. A. Petersson, H. Nakatsuji, X. Li, M. Caricato, A. V. Marenich, J. Bloino, B. G. Janesko, R. Gomperts, B. Mennucci, H. P. Hratchian, J. V., 2016.
2. Y. Zhao and D. G. Truhlar, *Theor. Chem. Acc.*, 2008, **120**, 215–241.
3. F. Weigend and R. Ahlrichs, *Phys. Chem. Chem. Phys.*, 2005, **7**, 3297–3305.
4. F. Weigend, *Phys. Chem. Chem. Phys.*, 2006, **8**, 1057–1065.
5. S. Grimme, J. Antony, S. Ehrlich and H. Krieg, *J. Chem. Phys.*, 2010, **132**, 154104.
